# Supplementary material
Source: publisher site journal article supplement (https://www.dovepress.com/get_supplementary_file.php?f=449388.docx)
Supplement: Supplementary file 1 [file get_supplementary_file.php]

**Supplementary Materials**


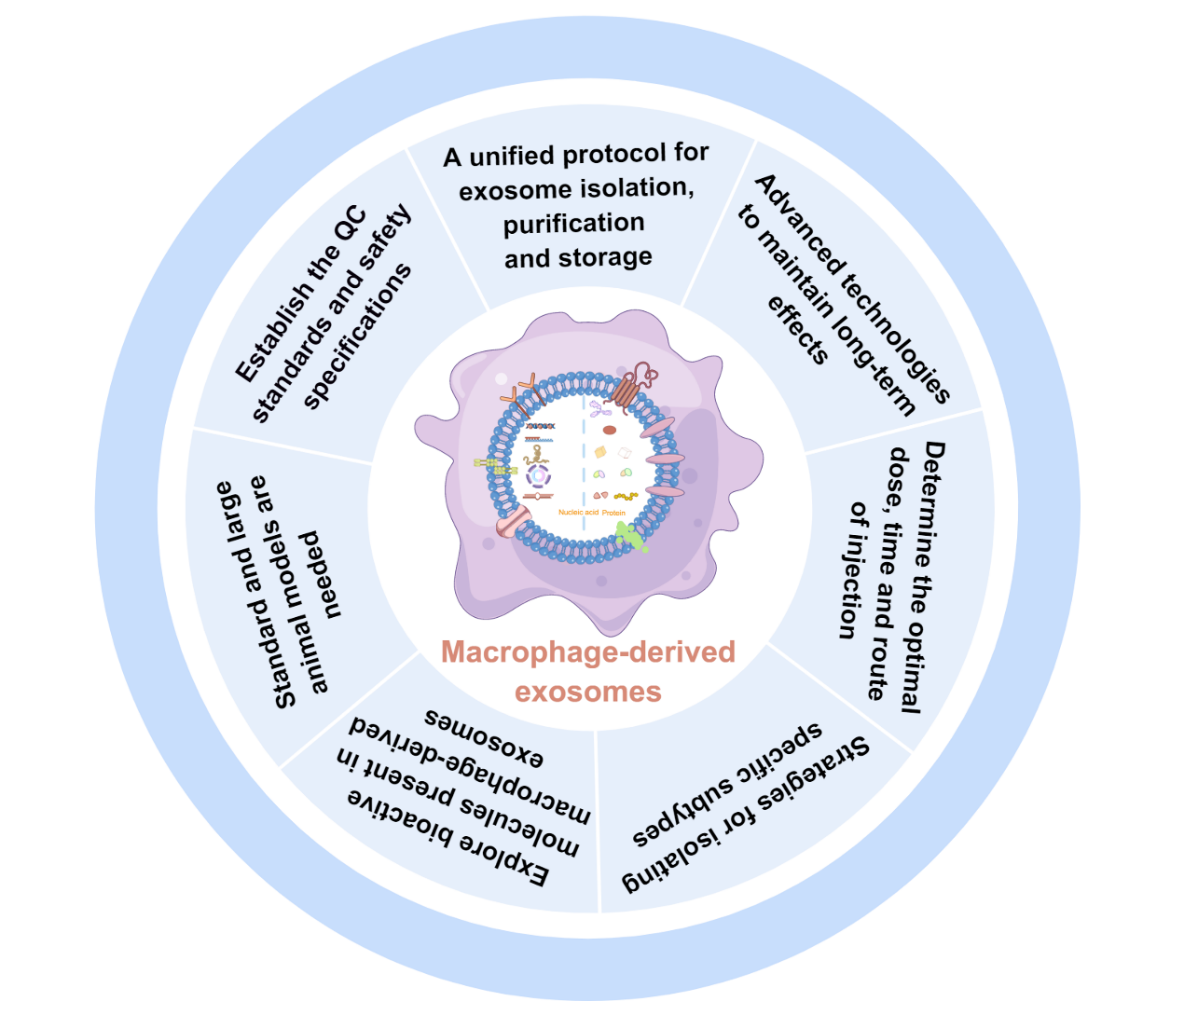


**Supplementary figure 1** Directions for the future diagnosis and therapy of inflammation and related diseases by using macrophage-derived exosomes in clinical applications.

**Supplementary table 1** Immunomodulatory and anti-inflammatory effects of macrophage-derived exosomes in inflammation

| Exosomes source | Animal type | Disease model | Route of administration | Exosomes dose | Isolation method | Therapeutic effects | Mechanism of action | Exosomes surface markers | References |
| --- | --- | --- | --- | --- | --- | --- | --- | --- | --- |
| RAW 264.7 cells | Sprague–Dawley (SD) rats | Diabetic rat wound models | Subcutaneous injection | High-concentration (1 mg/mL); Once | Ultracentrifuge (UC) | Inflammation↓  The secretion of proinflammatory enzymes and cytokines↓  Angiogenesis and re-epithelialization↑  wound-healing process↑ | Expression of TNF-α, IL-6↓  Expression of P-AKT↑  Expression of MMP-9↓ | CD63; Alix | [97] |
| Peripheral macrophages (Primary cell) | SD rats | Spinal Cord Injury models | Tail vein injection | 200 μg/ml;  Once | UC | Inflammation↓  Activation of microglial autophagy↑  The polarization of anti-inflammatory type microglia↑ | The PI3K/ AKT/ mTOR signaling pathway↓ | CD63; CD81; CD9; TSG101 | [98] |

**Supplementary table 2** Preconditioned macrophage-derived exosomes for inflammation therapy

| Exosomes source | Animal type/ cell type | Disease model | Preconditioned  Method | Route of administration | Exosomes dose | Isolation method | Therapeutic effects | Mechanism of action | Exosomes surface markers | References |
| --- | --- | --- | --- | --- | --- | --- | --- | --- | --- | --- |
| RAW 264.7 cells | C57BL/6 mice | Complete Freund’s adjuvant (CFA)-induced inflammatory pain model | LPS-stimulated | Intraplantar injection | 20 μl exosomes (0.5 μg); Once | UC | Inflammation↓  Paw swelling↓  Thermal hyperalgesia associated with CFA-induced inflammatory pain↓ | Activation of NF-κB↑ | TSG101;  HSP70 | [101] |
| RAW 264.7 cells | SD rats | Focal cerebral ischemia/reperfusion (MCAO/R) model | LPS-stimulated | Tail vein injection | 2 mg LPS-Ex was suspended in 1 mL PBS; Once | UC | Inflammation↓  Neuroprotective effects↑  M1 macrophages polarization↓  M2 macrophages polarization↑ | Expression of NF-κB p65, TNF-α, IL-6↓  Expression of CD206 and CD80↓ | CD9; Alix; CD81; TSG101 | [102] |
| Human  macrophages (Peripheral blood mononuclear cells) | Human  macrophages | Talaromyces marneffei-infected human macrophages model | Talaromyces marneffei conidia- infected | Pretreated | 50 μg/mL; 24h | The ExoQuick  Exosome Precipitation Solution (System Biosciences [SBI]) | The activation of the innate immune responses↑  The activation of ERK1/2 and autophagy↑  The release of IL‐10 and TNF-α in human macrophages↑  The replication of T. marneffei  in human macrophages↓ | Expression of IL-10 and TNF‐α↑  The LC3II/β‐actin ratio↑ | CD9, CD63, CD81 | [103] |
| The human monocytic cell line (THP-1) | Hypomorphic *Apoe*h/h*Ldlr*-/-  mouse | Diet-induced obesity and hyperlipidemia model | IL- 4-stimulated | Intraperitoneal injection | 1x1010 particles;  6 weeks | UC | Inflammation↓  Improve energy homeostasis in adipose tissue and hematopoietic compartments↑  M1 macrophages polarization↓  M2 macrophages polarization↑  Leukocyte numbers  and inflammatory activity in the circulation, aorta, adipose tissue, and the liver↓ | miR-21, miR-99a, miR-146b, miR-378a↑  miR-33↓  Expression of M2/ anti-inflammatory-associated markers (Arg1, Chil3, Retnla) ↑ | CD9, CD63, CD81 | [104] |
| Naive bone marrow-derived macrophages  (Primary cell) | *Apoe*–/– mice | Atherosclerosis model with a Western diet | Polarized with IL-4 | Intraperitoneal injection | 1x1010 particles;  4 weeks every  2 days | UC | Inflammation (by targeting NF-kB and TNF-a signaling)↓  M2 macrophages polarization↑  Necrotic lesion areas that collectively stabilize atheroma↓ | miR-99a, miR-146b, miR-378a↑  Expression of the inflammatory cytokines IL-1β and  TNF-α, Nos2↓  Expression of M2/ anti-inflammatory-associated markers (Arg1, Chil3, Retnla, Mrc1) ↑ | Alix, Flotillin, CD9 | [105] |
